# Supplementary material
Source: PubMed Central journal article supplement (PMC3668494)

## **SUPPLEMENTARY FIGURE LEGENDS**

### **Supplemental Figure 1. Sanger sequence analysis of 27 FA families confirms**

**mutations.** The family ID, gene mutated and the Sanger sequence traces showing each mutation are presented. In each case, data is presented for the “proband”, and when DNA is available, the father, mother, affected or normal siblings. The sequences are shown on top, and the base affected by the mutation is indicated (\*). The primers used for finding FA gene mutations from genomic DNA were previously published in a large number of papers.

### **Supplemental Figure 2. Sequence coverage of all of FA genes by WES capture and**

**sequencing for sample FA19.** UCSC browser track for an FA gene are shown above, while sequences aligned to the reference sequence after WES capture and sequencing are shown below. The gaps in the rectangle indicate sequence not covered. Since this is only an exon capture strategy, sequences shown are for the exon and the immediate flanking region. All sequences are from sample FA19.

### **Supplemental Figure 3. Sequence coverage of all of FA genes by TruSeq capture and**

**sequencing for sample FA26.** UCSC browser track for an FA gene are shown above, while sequences aligned to the reference sequence after TruSeq capture and sequencing are shown below. The gaps in the rectangle indicate sequence not covered. All sequences are from sample FA26.

### **Supplemental Figure 4: Variant *FANCL* transcripts in FA26 are caused by the c.375-**

**2033C>G mutation.** The four different transcript variants (A-D) presumably caused by the

c.3745-2033C>G mutation are shown in detail *via* RT-PCR using primers located in exon 2 and exon 8. The Sanger sequence traces are shown below each variant, and the splicing patterns based on these sequences are shown above each variant.

**Supplemental Figure 5. Variant *FANCI* transcripts in FA14 caused by the c.1583+142C>T mutation.** A) RT-PCR analysis of for the *FANCI* mutation region in FA14 fibroblast cell line total RNA, using the primers for exons 14 and 18. The aberrant products are indicated by filled circles (•, ••).

B) The UCSC browser track for the *FANCI* gene is shown on top with the expansion of exons 14-18, analyzed by RT-PCR. The mutation (\*), the WT sequence and the mutant sequence are indicated. The abnormal transcript that extends exon 16 by including the first 140 bases of intron 16 is indicated, along with the Sanger sequence trace.

**Supplemental Table 1: Targeted Gene Regions for MIP Capture and their Probe Design Coverage**

**Supplemental Table 2: Ancestry and Other Information of FA Families**

**Supplemental Table 3: Coverage of the Targeted Region After MIP Capture, Enrichment and Sequencing**

**Supplemental Table 4: Targeted Gene Regions for CGH Array Design**

**Supplemental Table 1: Targeted Gene Regions for MIP Capture and their Probe Design Coverage**

| Target Gene | Alternate Name | Target Region (hg18)*     | Design Coverage (%)†‡ |
|-------------|----------------|---------------------------|-----------------------|
| BLM         |                | chr15:89061583-89159690   | 94.21                 |
| BRCA1       |                | chr17:38449839-38531026   | 86.02                 |
| CHEK1       |                | chr11:125001883-125028952 | 95.42                 |
| CHEK2       |                | chr22:27413731-27467822   | 86.65                 |
| FANCA       |                | chr16:88330460-88411566   | 93.58                 |
| FANCB       |                | chrX:14770450-14802105    | 99.06                 |
| FANCC       |                | chr9:96900157-97120812    | 96.66                 |
| FANCD1      | BRCA2          | chr13:31786617-31872809   | 98.18                 |
| FANCD2      |                | chr3:10042113-10117344    | 93.86                 |
| FANCE       |                | chr6:35527116-35543859    | 93.94                 |
| FANCF       |                | chr11:22599655-22604963   | 100                   |
| FANCG       |                | chr9:35062835-35071013    | 96.53                 |
| FANCI       |                | chr15:87587198-87662366   | 97.52                 |
| FANCI       | BRIP1          | chr17:57113767-57296537   | 98.22                 |
| FANCL       |                | chr2:58238882-58323019    | 96.53                 |
| FANCM       |                | chr14:44673886-44740843   | 94.93                 |
| FANCN       | PALB2          | chr16:23520984-23561179   | 93.21                 |
| FOXC2       |                | chr16:85158358-85160036   | 58.64                 |
| FOXF1       |                | chr16:85101645-85105577   | 64.75                 |
| FOXL1       |                | chr16:85169616-85172805   | 94.7                  |
| RAD51       |                | chr15:38774651-38811648   | 90.66                 |
| RAD51AP1    |                | chr12:4518317-4539475     | 97.45                 |
| USP1        |                | chr1:62674563-62690063    | 96.22                 |
| WDR48       |                | chr3:39068511-39112885    | 95.37                 |

\*The Target Region includes ~1kb beyond either side of the gene, a total of 1.36 Mb

†Percentage of the targetted region covered by the designed capture probes

‡Probes could not be designed for exon 1 of FANCA and FANCE, as well as exons 18 and 19 of FANCD2

**Supplemental Table 2. Clinical and Other Prior Information of FA Families**

| Sample ID                             | Complementation | Gender | Ancestry                     | DNA Source |
|---------------------------------------|-----------------|--------|------------------------------|------------|
| <b>MIP Targeted Capture Method</b>    |                 |        |                              |            |
| FA1                                   | None            | Male   | N. European/Hispanic         | PB         |
| FA2                                   | None**          | Male   | N. European                  | PB         |
| FA3                                   | None**          | Male   | European                     | Fib        |
| FA4                                   | None**          | Male   | Ashkenazi Jewish             | PB         |
| FA5                                   | None**          | Female | N. European                  | PB         |
| FA6                                   | None**          | Female | Pakistani                    | LCL        |
| FA7                                   | None**          | Male   | Italian                      | LCL        |
| FA8                                   | None**          | Male   | N. European                  | PB         |
| FA9                                   | None            | Male   | N. European                  | PB         |
| FA10                                  | None            | Female | Ashkenazi Jewish             | Fib        |
| FA11                                  | FANCB           | Male   | N. European                  | Fib        |
| FA12                                  | FANCG           | Female | N. European, Native American | Fib        |
| FA13                                  | FANCL           | Female | N. European, Native American | Fib        |
| FA14                                  | nonACGEFL       | Female | N. European                  | LCL        |
| FA15                                  | nonACD1D2EFGI   | Male   | N. European                  | Fib        |
| FA16                                  | nonACG          | Female | N. European, Hispanic        | Fib        |
| FA17                                  | nonACG          | Female | Indian                       | Fib        |
| FA18*                                 | nonACG          | Female | N. European                  | LCL        |
| FA19*                                 | nonACFG         | Male   | N. European                  | LCL        |
| <b>TruSeq Targeted Capture Method</b> |                 |        |                              |            |
| FA20                                  | None            | Male   | N. European                  | PB         |
| FA21                                  | None**          | Female | European                     | LCL        |
| FA22                                  | None            | Male   | European                     | PB         |
| FA23                                  | None            | Male   | European                     | PB         |
| FA24                                  | None            | Male   | European                     | PB         |
| FA25                                  | None            | Male   | European                     | PB         |
| FA26                                  | None**          | Female | N. European                  | Fib        |
| FA27                                  | None            | Male   | European, Native American    | LCL        |

\* Also performed whole exome sequencing (WES)

\*\*Excluded FANCA by Sanger sequencing

PB=peripheral blood. Fib and LCL represent fibroblast and lymphoblastoid cell lines respectively

**Supplemental Table 3: Coverage of the Targeted Region After MIP Capture, Enrichment and Sequencing**

| Sample ID | Post-Seq Coverage, Total (%)* | Post-Seq coverage, Exons (%)* |
|-----------|-------------------------------|-------------------------------|
| FA1       | 88.72                         | 95.36                         |
| FA2       | 87.53                         | 95.63                         |
| FA3       | 85.31                         | 94.93                         |
| FA4       | 88.32                         | 95.26                         |
| FA5       | 88.36                         | 95.56                         |
| FA6       | 88.19                         | 95.17                         |
| FA7       | 87.82                         | 95.53                         |
| FA8       | 88.44                         | 95.54                         |
| FA9       | 85.5                          | 95.16                         |
| FA10      | 84.4                          | 93.81                         |
| FA11      | 85.8                          | 95.08                         |
| FA12      | 84.8                          | 94.68                         |
| FA13      | 86.4                          | 95.09                         |
| FA14      | 74                            | 91.33                         |
| FA15      | 85.3                          | 93.99                         |
| FA16      | 87.4                          | 94.12                         |
| FA17      | 82.1                          | 89.68                         |
| FA18      | 87.2                          | 94.61                         |
| FA19      | 77.1                          | 91.56                         |

\*Represents the genotype calls with a >10 mpq score after aligning the sequences to the reference genome

**Supplemental Table 4: Targeted Gene Regions for CGH Array Design**

| Target Gene | Alternate Name(s) | Target Region (hg18)*                |
|-------------|-------------------|--------------------------------------|
| AP1TD1      | MHF1 (CENP-S)     | chr1:10402746-10435459               |
| BLM         |                   | chr15:89051583-89169690              |
| BRCA1       |                   | chr17:38439840-38540994              |
| CDKN2A      |                   | chr9:21947751-21994490               |
| FAAP100     | C17orf70          | chr17:77107387-77139868              |
| FAAP24      | C19orf40          | chr19:38144988-38169800              |
| FANCA       |                   | chr16:88131460-88610566 <sup>†</sup> |
| FANCB       |                   | chrX:14671450-14901105 <sup>‡</sup>  |
| FANCC       |                   | chr9:96701501-97319867 <sup>‡</sup>  |
| FANCD1      | BRCA2             | chr13:31777617-31881809              |
| FANCD2      |                   | chr3:9993451-10166418 <sup>§</sup>   |
| FANCE       |                   | chr6:35518116-35552859               |
| FANCF       |                   | chr11:22590655-22613963              |
| FANCG       |                   | chr9:35013835-35120013 <sup>§</sup>  |
| FANCI       |                   | chr15:87578198-87671366              |
| FANCL       | BRIP1             | chr17:57104767-57306537              |
| FANCM       |                   | chr2:58229882-58333019               |
| FANCN       | PALB2             | chr14:44664886-44749843              |
| FANCO       | RAD51C            | chr16:23511984-23570179              |
| FANCP       | SLX4 (BTBD12)     | chr17:54114962-54176691              |
| MRE11       |                   | chr16:3561184-3611586                |
| NBN         |                   | chr11:93780115-93876688              |
| RAD50       |                   | chr8:91004740-91076075               |
| RAD51AP1    |                   | chr5:131910529-132017494             |
| SMAD4       |                   | chr12:4508317-4549475                |
| STRA13      | MHF2 (CENP-X)     | chr18:46800581-46875407              |
|             |                   | chr17:77559868-77584062              |

\*Target regions extend 10kb beyond either side of the gene, unless noted otherwise.

<sup>†</sup>Extends 200kb beyond either side of the gene

<sup>‡</sup>Extends 100kb beyond either side of the gene

<sup>§</sup>Extends 50kb beyond either side of the gene

Median Spacing: 50bp

Multiple (3) Probes

# Supplemental Figure 1. Validation of Sequence Variants by Sanger Sequencing

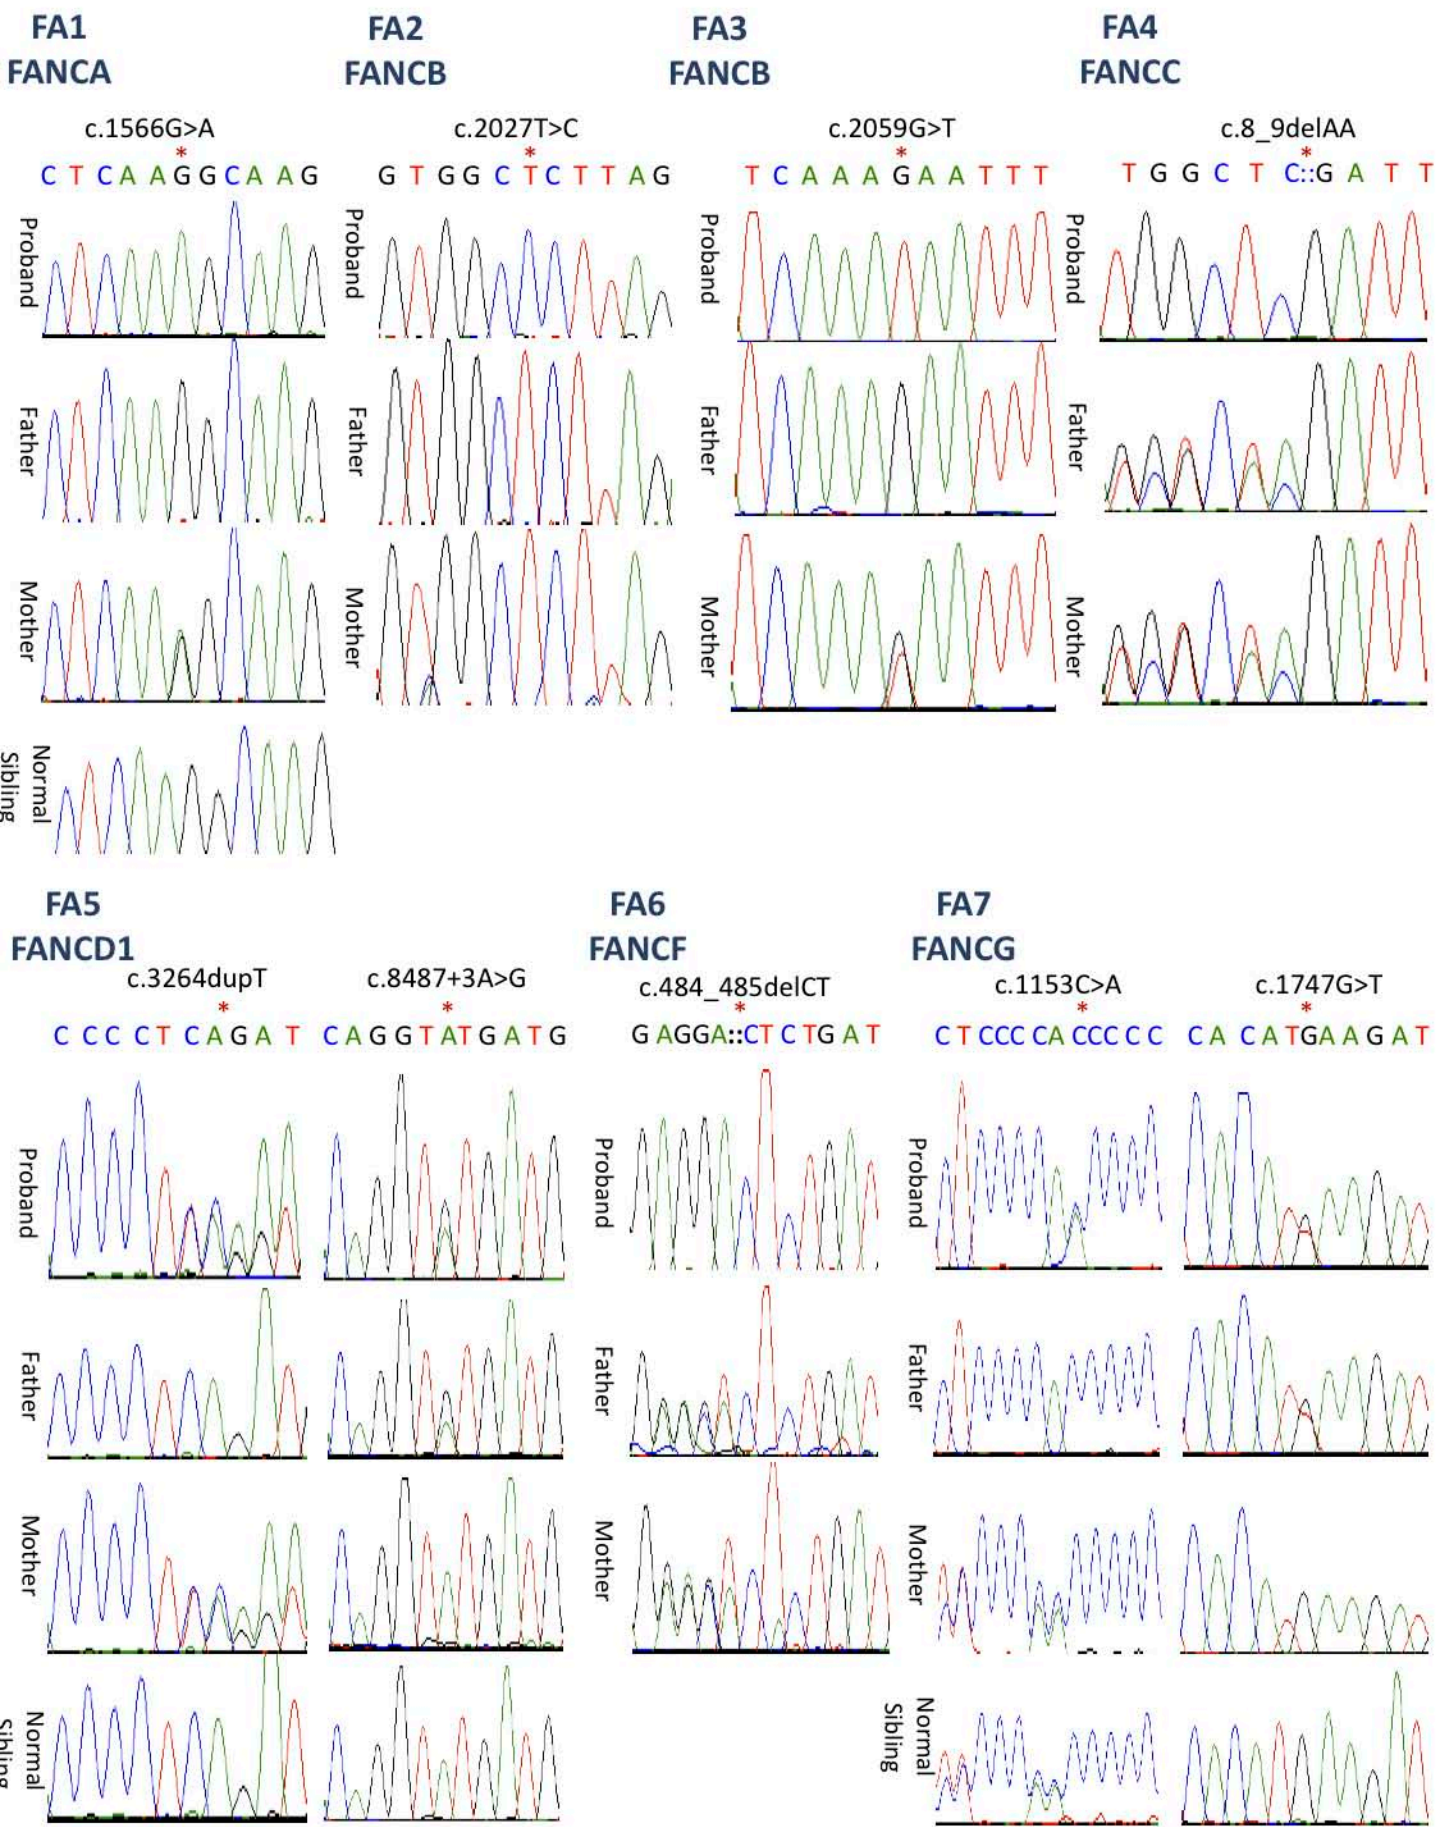



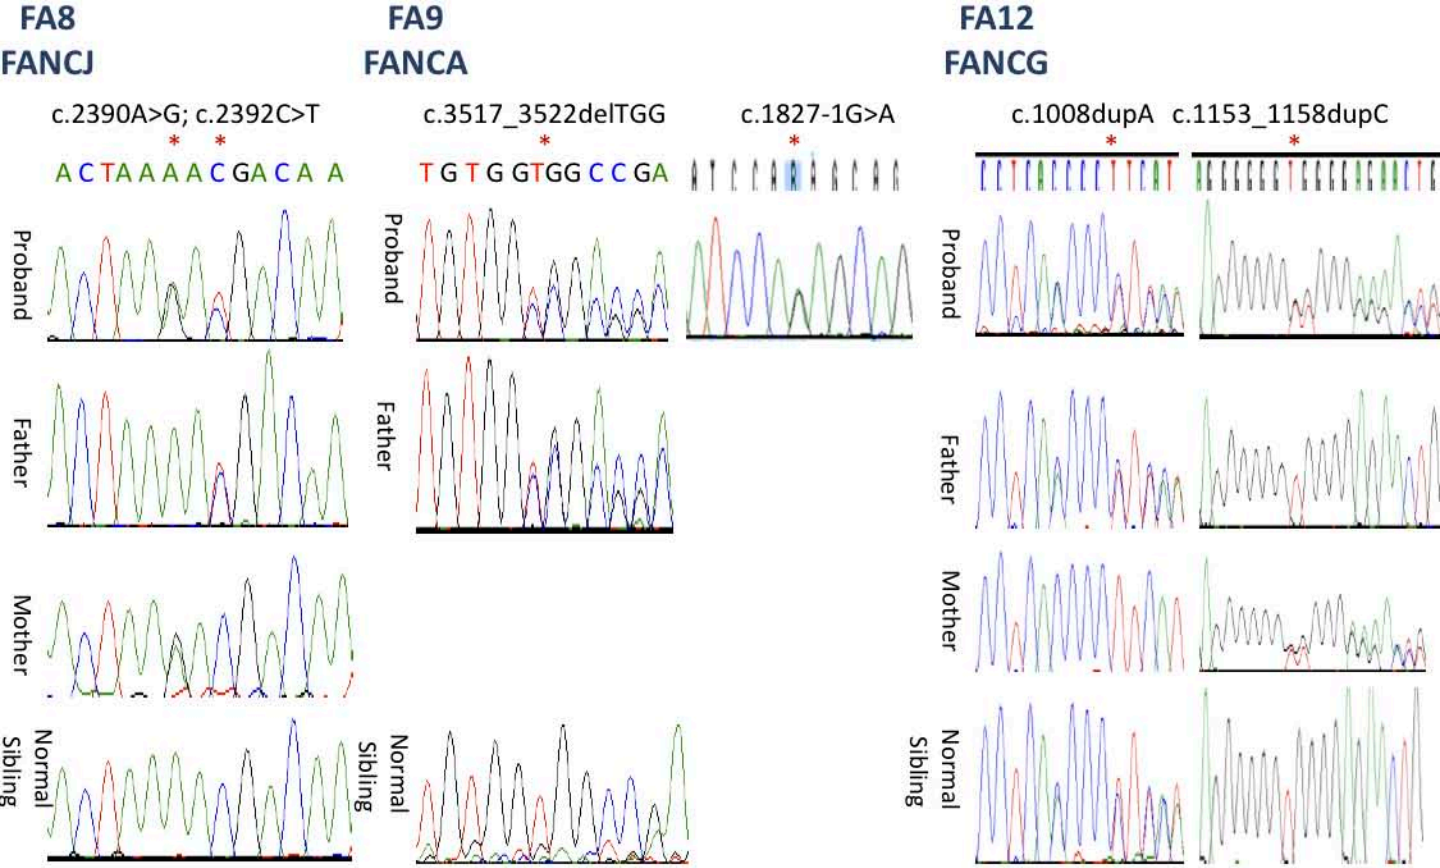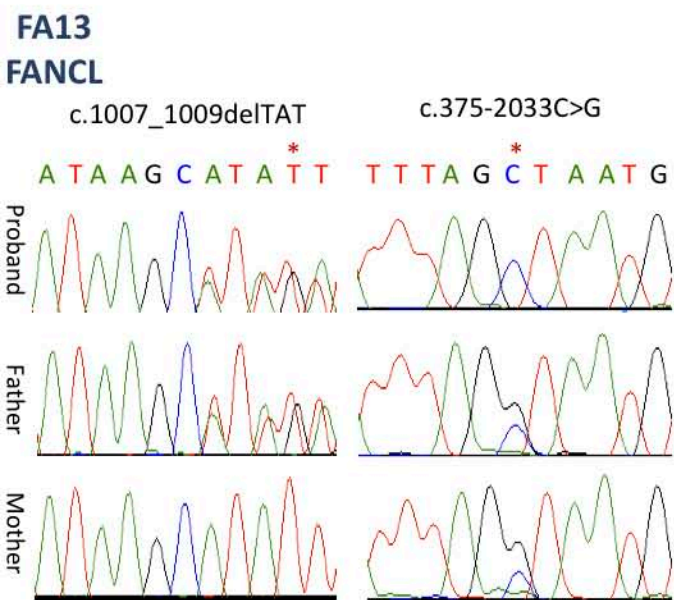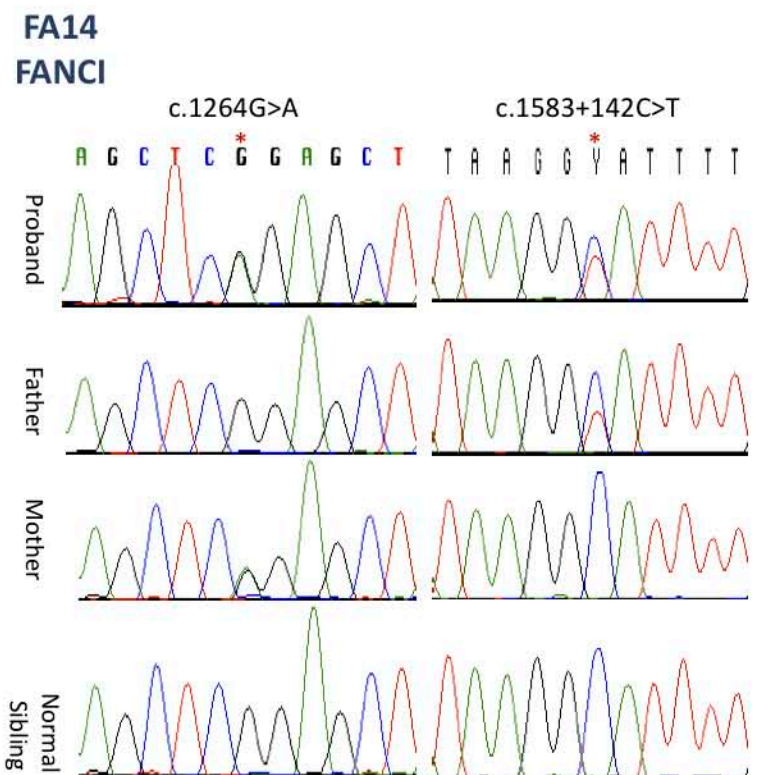

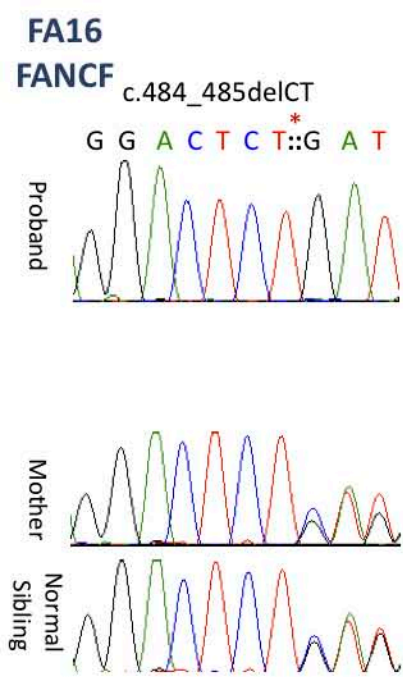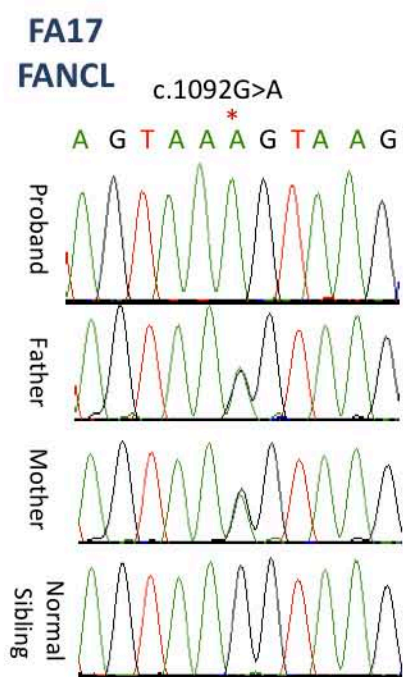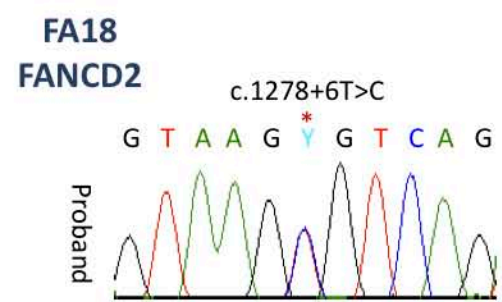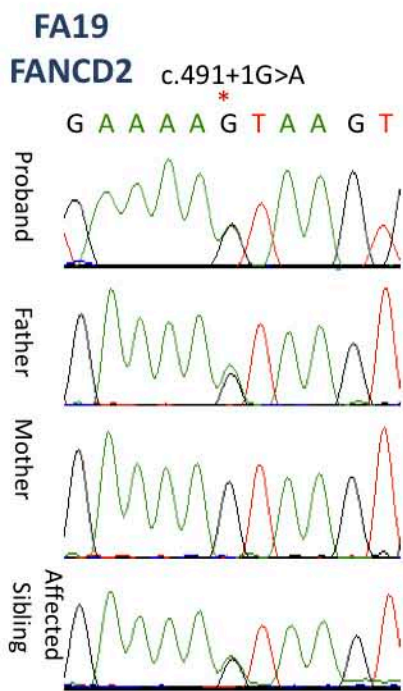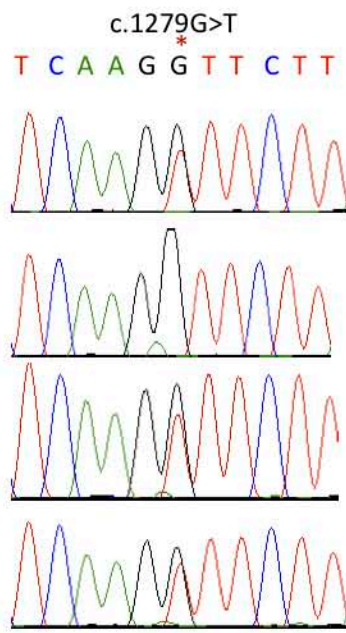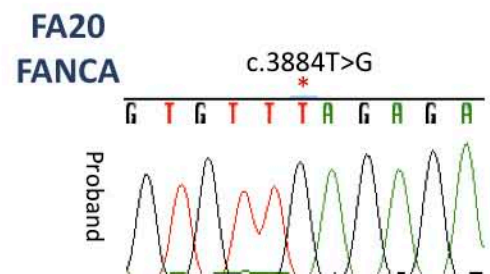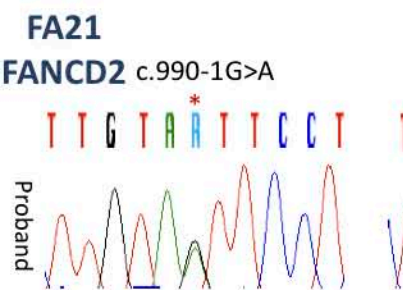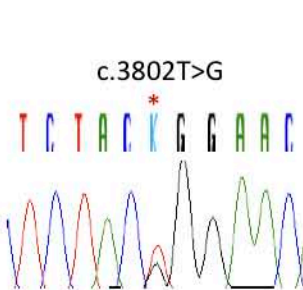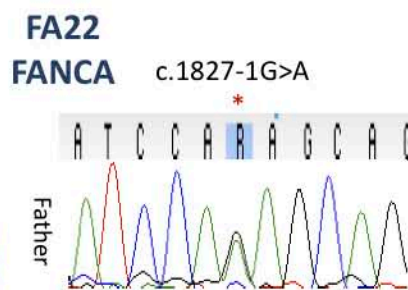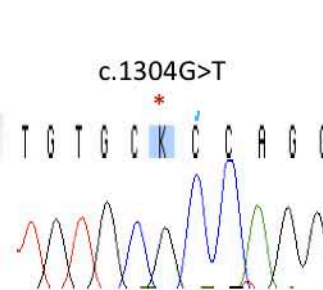

**FA23****FANCA** c.3348+1G>A c.3520\_3522delTGG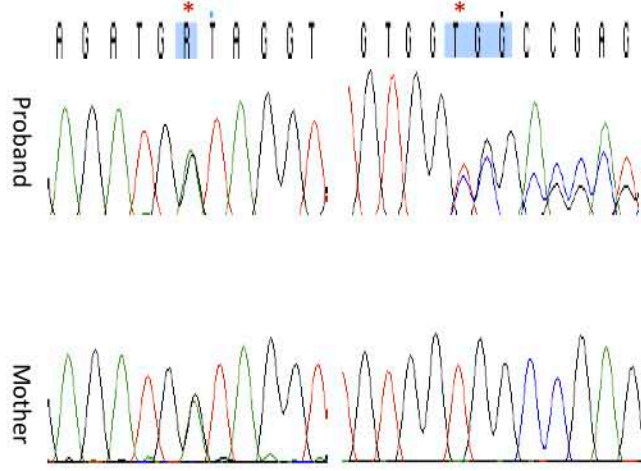**FA24****FANCA** c.1378C>T c.1115\_1118delTTGG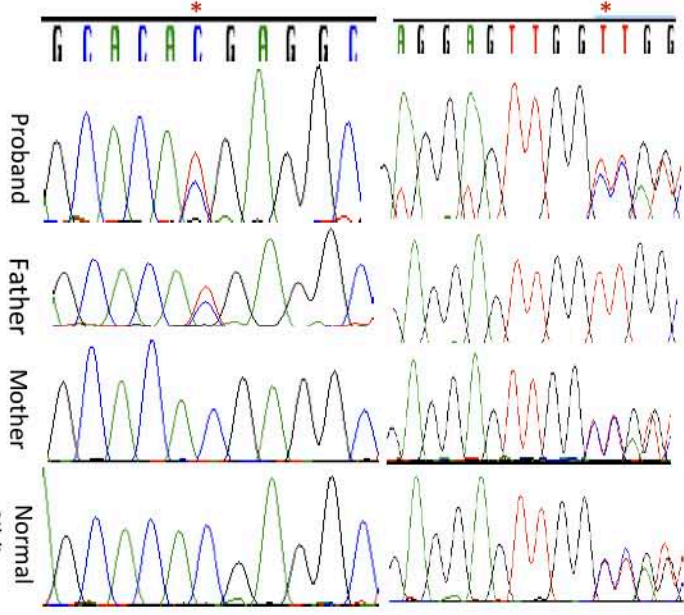**FA25****FANCC** c.553C>T c.67delG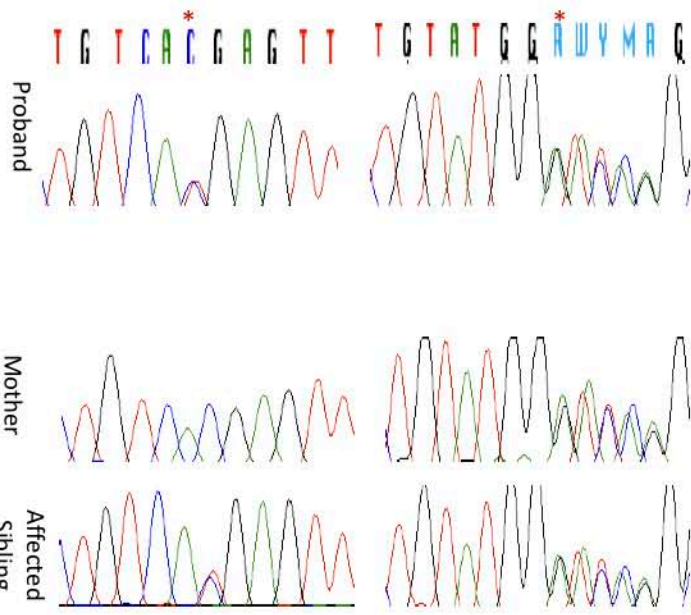**FA26****FANCL** c.375-2033C>G c.871\_874delGATT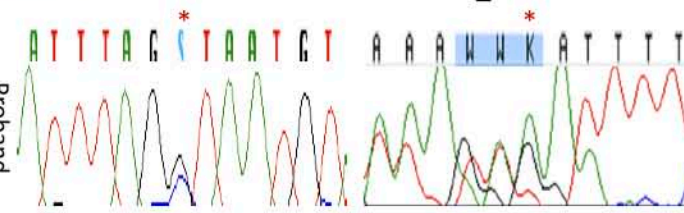**FA27****FANCA** c.1827-1G>A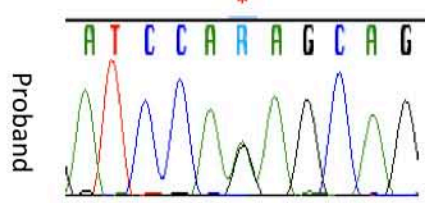

# Supplemental Figure 2: Whole Exome Sequencing Coverage of FA Genes

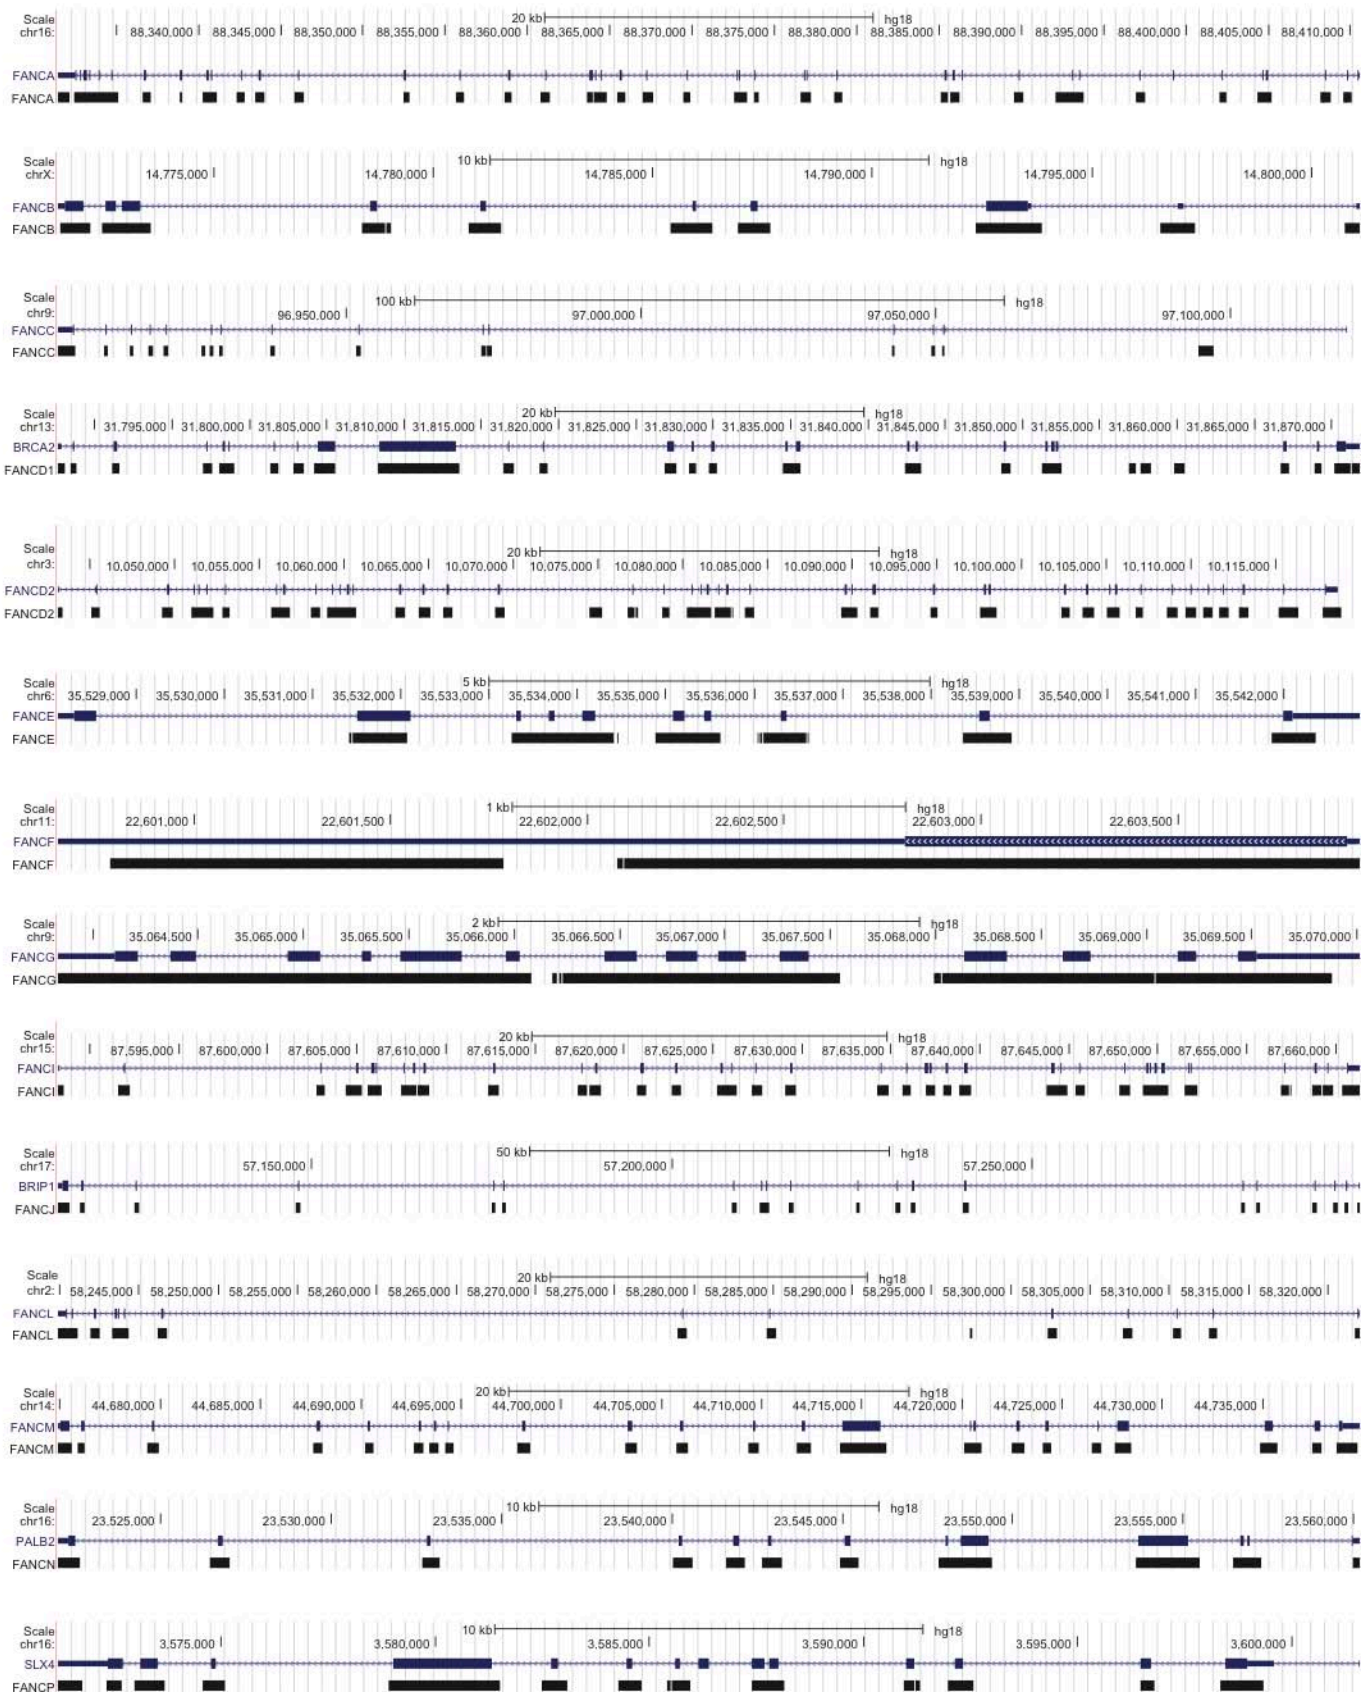

# Supplemental Figure 3: Tru-Seq Coverage of FA genes

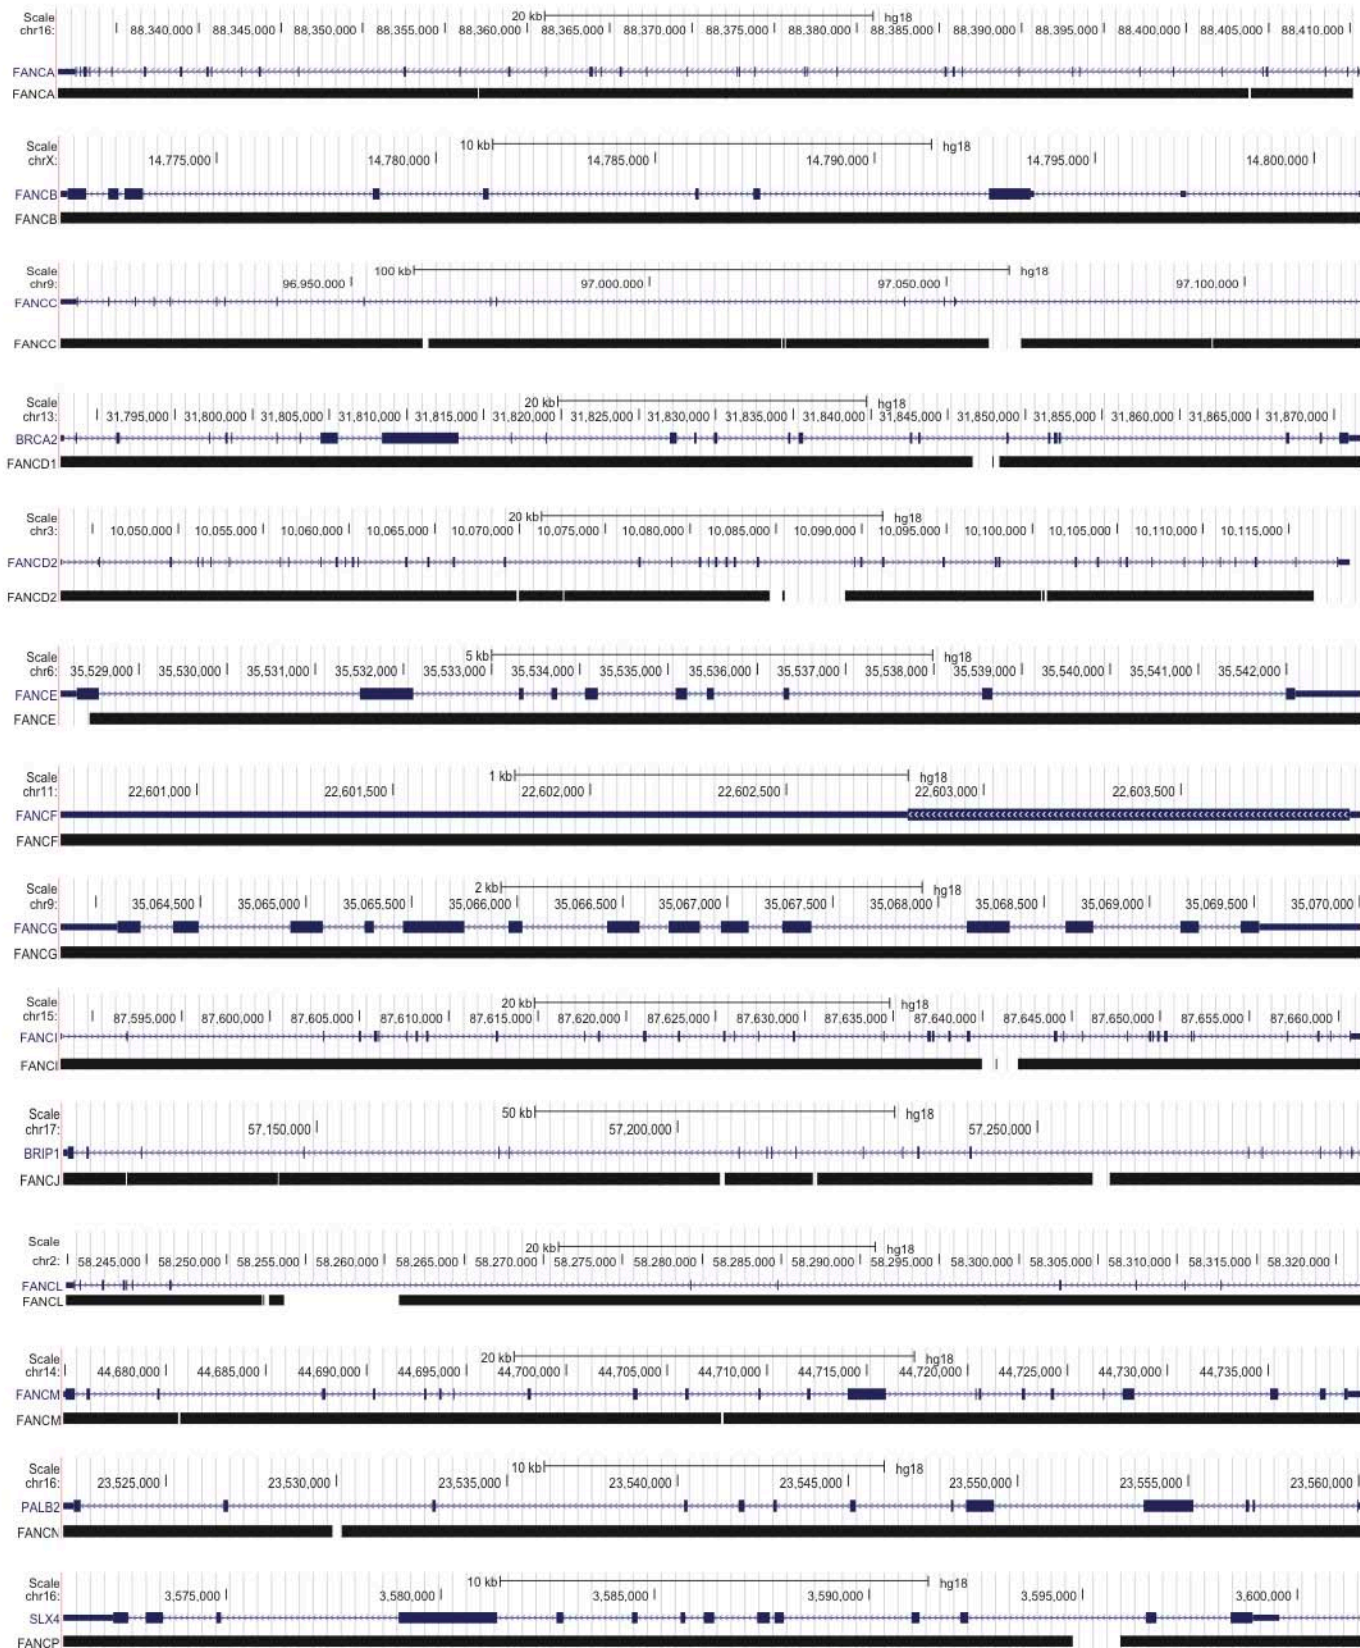



# Supplemental Figure 5. Transcript Variants in FA14

A.

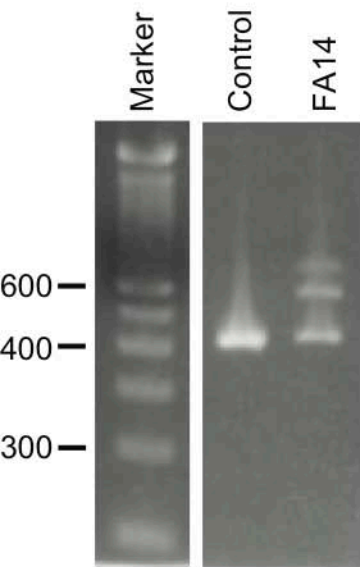

B.

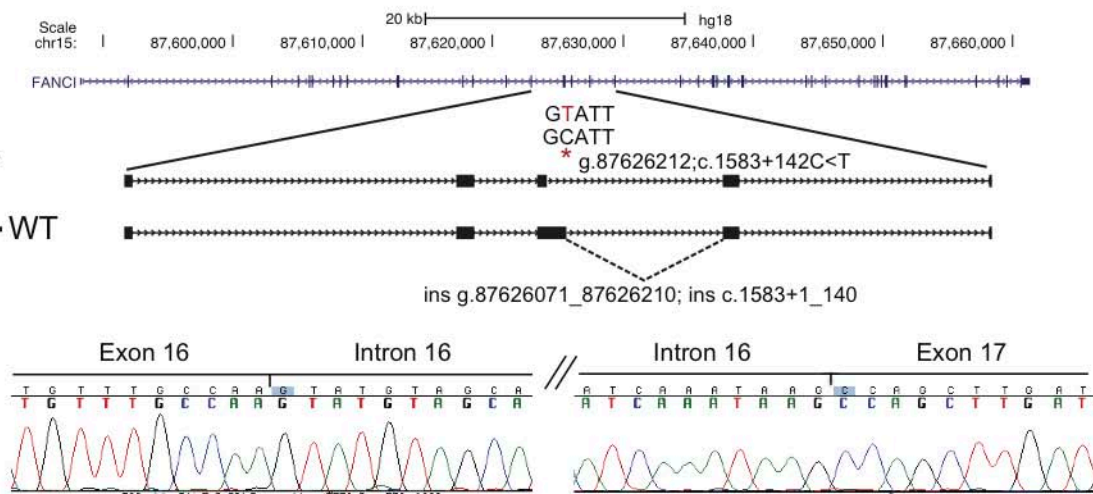

Supplement: supp_blood-2012-12-474585_blood-2012-12-474585-1.pdf [file supp_blood-2012-12-474585_blood-2012-12-474585-1.pdf]
